# Supplementary material for: Ab initio and transition state theory study of the OH + HO2 → H2O + O2(3Σg−)/O2(1Δg) reactions: yield and role of O2(1Δg) in H2O2 decomposition and in combustion of H2
Source: Royal Society of Chemistry journal article supplement (doi:10.1039/c7cp05850k), 2018-01-01
Supplement: c7cp05850k1.pdf [file c7cp05850k1.pdf]

## SUPPORTING INFORMATION

### *Ab Initio* and Transition State Theory Study of the $\text{OH} + \text{HO}_2 \rightarrow \text{H}_2\text{O} + \text{O}_2(^3\Sigma_g^-)/\text{O}_2(^1\Delta_g)$

#### Reactions: Yield and Role of $\text{O}_2(^1\Delta_g)$ in $\text{H}_2\text{O}_2$ Decomposition and in Combustion of $\text{H}_2$

M. Monge-Palacios, S. Mani Sarathy

The results of the flame speeds of the  $\text{H}_2$ -Air and  $\text{H}_2$ -22.18%  $\text{O}_2(^3\Sigma_g^-)$  + 1.11%  $\text{O}_2(^1\Delta_g)$  + 76.71%  $\text{N}_2$  mixtures at 1 atm and 300 K are shown in Figure S1 at different equivalent ratios,  $\phi$ , using Konnov's and our updated model.

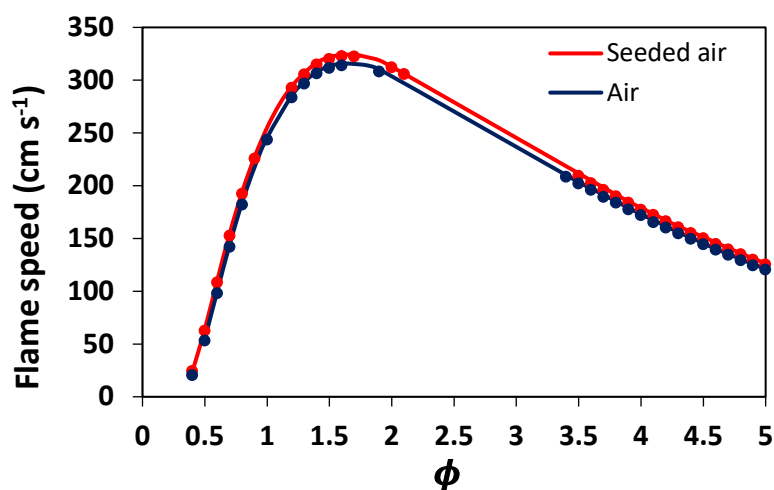

**Figure S1.** Flame speed of the  $\text{H}_2$ -Air (blue line) and  $\text{H}_2$ -22.18%  $\text{O}_2(^3\Sigma_g^-)$  + 1.11%  $\text{O}_2(^1\Delta_g)$  + 76.71%  $\text{N}_2$  (red line) mixtures as function of equivalent ratio using Konnov's (points) and our updated model (solid line).

Both models predict similar results, with no effect of the new kinetic information for the  $\text{OH} + \text{HO}_2 \rightarrow \text{H}_2\text{O} + \text{O}_2(^1\Delta_g)$  reaction. However, in mixtures seeded with  $\text{O}_3$  small differences appear in the flame speed. These results are shown in Figure S2 for a mixture  $\text{H}_2$ -60.9%  $\text{O}_2(^3\Sigma_g^-)$  + 39.1%  $\text{O}_3$ ; it can be seen that our updated model predicts a slightly larger flame speed. For instance, at the equivalent ratio of 0.7 the flame speed becomes around 3.7% larger than that predicted by Konnov's model.

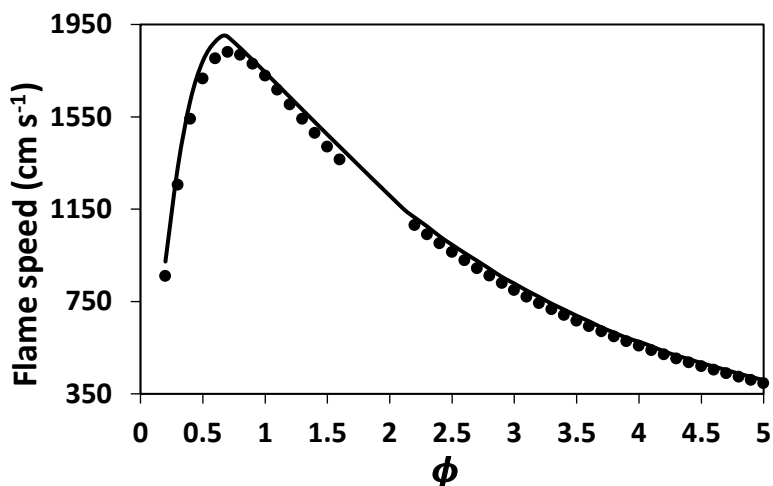

**Figure S2.** Flame speed of the H<sub>2</sub>-60.9% O<sub>2</sub>(<sup>3</sup>Σ<sub>g</sub><sup>-</sup>) + 39.1% O<sub>3</sub> mixtures as function of equivalent ratio using Konnov's (points) and our updated model (solid line).

In Figure S3 the ignition delay time (based on d[OH]/dt) obtained with both models is plotted in the temperature range 900–2000 K for the mixture 0.81% H<sub>2</sub> + 4.03% O<sub>2</sub>(<sup>3</sup>Σ<sub>g</sub><sup>-</sup>) + Ar at different initial pressures. No differences were found with respect to Konnov's model predictions.

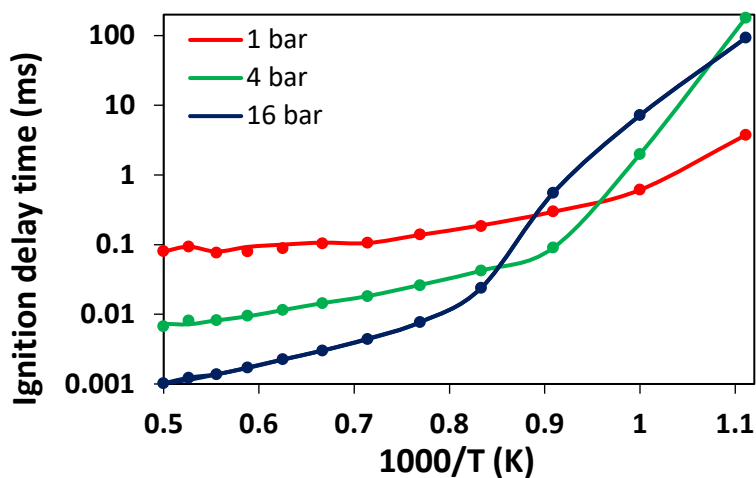

**Figure S3.** Ignition delay time of the 0.81% H<sub>2</sub> + 4.03% O<sub>2</sub>(<sup>3</sup>Σ<sub>g</sub><sup>-</sup>) + Ar mixture as function of temperature using Konnov's (points) and our updated model (solid line) at different pressures.
